# Supplementary material for: Microchemostat array with small-volume fraction replenishment for steady-state microbial culture
Source: Royal Society of Chemistry journal article supplement (doi:10.1039/c3lc50665g), 2013-01-01

## Supplementary Information

**Supplementary Figure S1.** (A) A close-up image of cells passing through the shallow replenishment region (depth: 20  $\mu\text{m}$ ). (B) A microscopic image showing uniform distribution of cells upon exit from the replenishment region into the circulation region (depth: 100  $\mu\text{m}$ ).

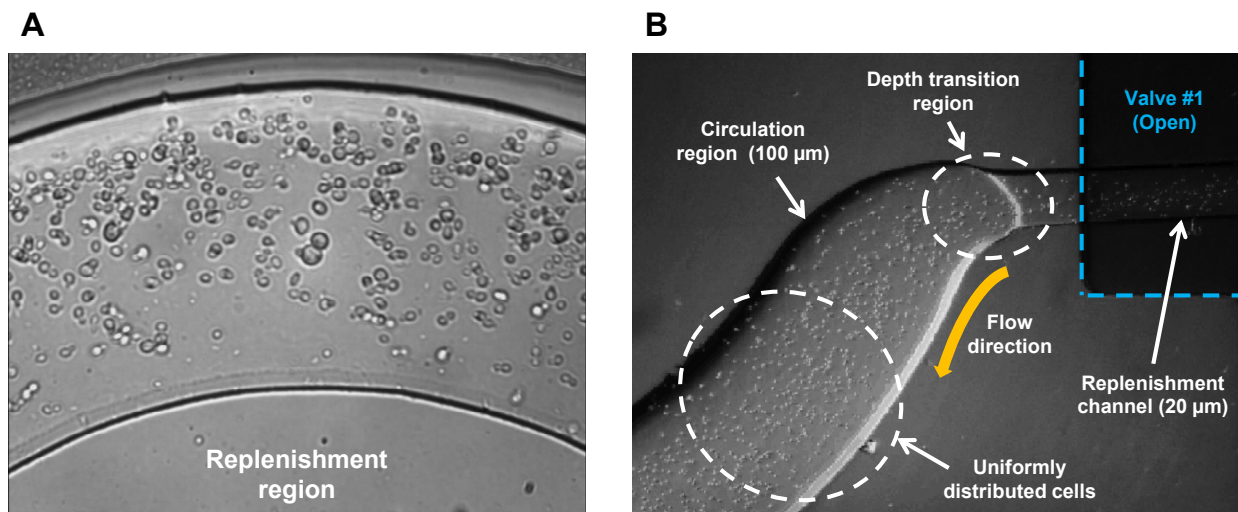

Supplement: c3lc50665g.pdf [file c3lc50665g.pdf]
